# Supplementary material
Source: MDPI journal article supplement (https://www.mdpi.com/1996-1073/14/13/4043)
Supplement: s1 [file s1]

### Supplementary Information

**Title:** Risk assessment of hydrogen refueling stations in urban areas using independent protection layer (IPLs) of protection analysis (LOPA) and RISKCURVES

**Table S1.** Summary of with/without IPLs

| No | Components         | Type of used IPLs |        | Leak frequency (/year) |                  |           |
|----|--------------------|-------------------|--------|------------------------|------------------|-----------|
|    |                    | Passive           | Active | Without IPLs           | After<br>Passive | Active    |
| 1  | Dispenser          | P2, P6            | A2     | 9.88E10-5              | 9.88E10-9        | 9.88E10-7 |
| 2  | H2 storage<br>(HP) | P1, P3, P4,<br>P6 | A1, A2 | 1.02E10-4              | 1.02E10-12       | 1.02E10-7 |
| 3  | H2 storage<br>(LP) |                   |        | 1.02E10-4              | 1.02E10-12       | 1.02E10-7 |
| 4  | Tube trailer       |                   |        | 1.80E10-4              | 1.80E10-12       | 1.80E10-7 |
| 5  | Compressor         | P6                | A1, A2 | 4.24E10-6              | 4.24E10-8        | 4.24E10-9 |
| 6  | Priority<br>panel  | P6                | A1, A2 | 3.84E10-5              | 3.84E10-7        | 3.84E10-8 |

**Table S2.** Summary of individual risk for each position

| No | Analysis Position | IPLs         |            |            |
|----|-------------------|--------------|------------|------------|
|    |                   | Without IPLs | Passive    | Active     |
| 1  | I                 | 2.54E10-4    | 4.15E10-8  | 9.66E10-7  |
| 2  | II                | 2.30E10-9    | 2.30E10-11 | 2.30E10-12 |
| 3  | III               | 7.636E10-5   | 7.13E10-9  | 7.18E10-7  |

**Table S3.** Summary of societal risk with/without IPLs

| No | Components         | Without IPLs        |          | Passive IPLs        |          | Active IPLs         |          |
|----|--------------------|---------------------|----------|---------------------|----------|---------------------|----------|
|    |                    | Contribution<br>(%) | Value    | Contribution<br>(%) | Value    | Contribution<br>(%) | Value    |
| 1  | Dispenser          | 47.3                | 1.11E-03 | 175                 | 1.11E-07 | 90                  | 1.11E-05 |
| 2  | H2 storage<br>(HP) | 8.74                | 2.05E-04 | 3.17E-04            | 2.01E-12 | 1.66                | 2.05E-07 |
| 3  | H2 storage<br>(LP) | 1.69                | 3.97E-05 | 6.23E-05            | 3.97E-13 | 0.321               | 3.97E-08 |
| 4  | Tube trailer       | 40                  | 9.40E-04 | 1.48E-03            | 9.40E-12 | 7.61                | 9.40E-07 |
| 5  | Compressor         | 0.336               | 7.88E-06 | 124                 | 7.88E-08 | 0.0638              | 7.88E-09 |
| 6  | Priority<br>panel  | 1.9                 | 4.47E-05 | 702                 | 4.47E-07 | 0.362               | 4.47E-08 |
